# Supplementary material
Source: MDPI journal article supplement (https://www.mdpi.com/2073-4441/14/3/357)
Supplement: s1 [file s1 › water-1524348-supplementary.pdf]

# Using Sawdust Derived Biochar as a Novel 3D Particle Electrode for Micropollutants Degradation

Athanasia Petala <sup>1,2</sup>, Georgios Bamos <sup>1,2</sup> and Zacharias Frontistis <sup>1,\*</sup>

Fourier transform infrared (FTIR) spectroscopy was performed using a Perkin Elmer Spectrum RX FTIR system. The measurement range was 4000–950  $\text{cm}^{-1}$ . BCS<sub>650</sub> (about 0.5%) and KBr were sieved and pressured to produce a homogeneous disk.

FTIR spectrum of the BCS<sub>650</sub> is shown in Figure S1. The peak at 3450  $\text{cm}^{-1}$  is assigned to stretching vibration of the –OH groups. The peaks at about 1640 and 1380  $\text{cm}^{-1}$  correspond to C=C and C–OH groups.

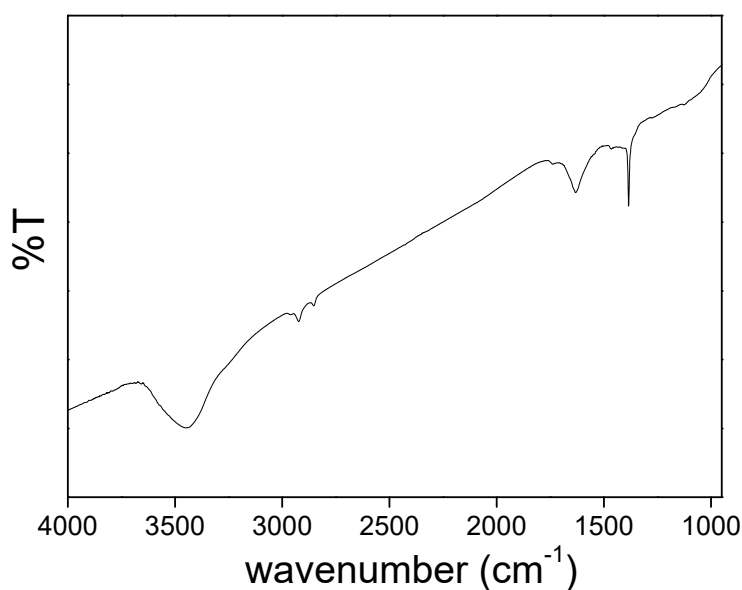

**Figure S1.** FTIR spectrum of the BCS<sub>650</sub>.
